1           **Dissection of the *Fgf8* regulatory landscape by *in vivo* CRISPR-editing reveals**  
2                           **extensive inter- and intra-enhancer redundancy**

3

4

5   **Hörnblad, A.<sup>1,2,3</sup>, Langenfeld, K.<sup>1</sup>, Bastide, S.<sup>1,2,3</sup>, Langa Vives, F.<sup>3</sup>, Spitz, F.<sup>1,2,3</sup>**

6

7   <sup>1</sup> Developmental Biology Unit, EMBL, Meyerhofstrasse 1, Heidelberg 69117, Germany.

8   <sup>2</sup> (Epi)genomics of animal Development Unit, Department of Developmental and Stem  
9   Cell Biology, Institut Pasteur, 75015 Paris, France

10   <sup>3</sup> CNRS, UMR3738.

11   <sup>4</sup> Mouse Genetics Engineering, Center for Innovation & Technological Research, Institut  
12   Pasteur, 75015 Paris, France

13

14

15

16

17   correspondence to FS:

18           francois.spitz@pasteur.fr

19

20

21 **Abstract**

22 Developmental genes are often regulated by multiple elements with overlapping  
23 activity. Yet, in most cases, the relative function of those elements and their contribution  
24 to endogenous gene expression remain uncharacterized. Illustrating this situation,  
25 distinct sets of enhancers have been proposed to direct *Fgf8* in the limb apical  
26 ectodermal ridge (AER) and the midbrain-hindbrain boundary (MHB). Using *in vivo*  
27 CRISPR/Cas9 genome engineering, we functionally dissect this complex regulatory  
28 ensemble and demonstrate two distinct regulatory logics. In the AER, the control of *Fgf8*  
29 expression appears extremely distributed between different enhancers. In contrast, in  
30 the MHB, one of the three active enhancers is essential while the other two are  
31 dispensable. Further dissection of the essential MHB enhancer revealed another layer of  
32 redundancy and identified two sub-parts required independently for *Fgf8* expression  
33 and formation of midbrain and cerebellar structures. Interestingly, cross-species  
34 transgenic analysis of this enhancer suggests changes of the organisation of this  
35 essential regulatory node in the vertebrate lineage.

36

37

## 38 **Introduction**

39 A fundamental feature of animal development is the dynamic and highly reproducible  
40 spatiotemporal expression of many key genes. This spatial and temporal specificity is  
41 coordinated through the actions of *cis*-regulatory elements that can reside very far (up  
42 to Mb) from their target genes and even be located within neighbouring genes <sup>1-6</sup>.  
43 Transgenic studies have been important to identify enhancer sequences with regulatory  
44 activity in the genome <sup>7</sup>, but with a low throughput. More recently, next generation  
45 sequencing approaches such as chromosome conformation capture, ChIP-seq, DNase-  
46 seq and ATAC-seq allowed for more comprehensive identification of candidate  
47 regulatory regions <sup>1,2,4,8</sup>. These studies have demonstrated that the regulatory  
48 architecture of developmental genes is complex: it frequently includes multiple  
49 regulatory elements, dispersed over large genomic regions <sup>9</sup>, that often display  
50 overlapping and/or redundant activity. As useful they are, a strong limitation of these  
51 approaches is that they do not determine how important those elements are for gene  
52 expression. Indeed, it happens frequently that enhancers with strong transgenic  
53 activities have a surprisingly minor function *in vivo* in the control of their endogenous  
54 gene <sup>10-13</sup>. Because of this difference between function and activity, there is an urgent  
55 need to develop strategies to characterize the biological function of non-coding  
56 regulatory elements *in vivo* and *in situ*. Traditional gene targeting approaches have  
57 demonstrated the functional importance of individual enhancers, but the throughput of  
58 these techniques is relatively low <sup>14-16</sup>. Here, we deployed a Crispr/Cas9 *in vivo* genome-  
59 engineering approach to systematically dissect the functional importance of individual  
60 enhancers as well as their intrinsic logic *in vivo*, using the *Fgf8* locus as a model system.

61

62 FGF8 is a secreted signalling molecule with a highly dynamic gene expression pattern  
63 during development. It is essential for the normal development of the brain, craniofacial  
64 skeleton, limbs, and various other organs <sup>17-22</sup>. FGF8 is the key molecule for the  
65 formation and activity of the isthmic organizer (IsO) located at the border between the  
66 mesencephalon and metencephalon <sup>23-25</sup> and that plays essential roles for patterning the  
67 midbrain and cerebellum <sup>17,26</sup>. Targeted deletion of *Fgf8* in the MHB leads to down-  
68 regulation of MHB markers and subsequent loss of the midbrain and anterior hindbrain  
69 <sup>26</sup>. In the limb, *Fgf8* is expressed in apical ectodermal ridge (AER), at the distal tip of the

70 limb bud. Absence of *Fgf8* leads to aberrant proximo-distal and anterior-posterior  
71 patterning, increased apoptosis in the limb bud and subsequent loss or hypoplasia of  
72 specific skeletal <sup>20,21</sup>.

73 Although the consequences of *Fgf8* down-regulation in the MHB and AER have been well  
74 characterized <sup>20,21,26-28</sup>, less is known about the regulatory elements directing *Fgf8*  
75 expression in these structures. In a recent study, we characterized a 200kb region  
76 forming the *Fgf8* regulatory landscape and identified three enhancers with the potential  
77 to drive expression in the mouse MHB and five enhancers that could drive expression in  
78 the limb AER <sup>6</sup>. The MHB enhancers are highly conserved from fish to mammals and two  
79 of them have indeed been identified as potential drivers of *Fgf8* expression also in the  
80 zebrafish MHB <sup>6,29-31</sup>. The limb enhancers show a more diverse degree of conservation  
81 but all of them are conserved at least from amniotes to mammals <sup>6</sup>.

82 In this study we address the *in vivo* contribution of these two sets of enhancers to *Fgf8*  
83 expression in the limb and the MHB, respectively. Using CRISPR/Cas9 genome editing  
84 we demonstrate extensive redundancy between enhancers in the limb, while in the  
85 MHB, one distant primary enhancer is essential for *Fgf8* expression. We further dissect  
86 the main MHB enhancer extensively to identify its functional units and define two  
87 essential subunits required for its function. Intriguingly, although deletion of only 37bp  
88 is enough to abrogate the regulatory potential of this enhancer and cause loss of  
89 midbrain and cerebellar structures, we also reveal widespread functional redundancy  
90 within this essential enhancer. Furthermore, we demonstrate that albeit sequence  
91 conservation predicts similar enhancer activity in fish and mouse, the functional  
92 subunits of the enhancer appear to have diverged and reorganized their regulatory logic.

93

## 94 **Results**

95

### 96 **Extensive regulatory redundancy for *Fgf8* expression in the limb**

97 A previous study identified a set of putative limb and MHB enhancers in the *Fgf8* locus  
98 with the potential to drive gene expression in these tissues <sup>6</sup> (Fig1A). In order to  
99 investigate their *in vivo* role, we generated mice with targeted deletions of each  
100 individual enhancer as well as compound deletions of the two proximal MHB enhancers.  
101 To this end we performed zygote injections of Cas9 mRNA and two chimeric gRNAs  
102 flanking the regions of interest (FigS1, TableS1 and methods, *in vivo* deletion efficiency

103 ranging from 4 to 40% in born pups). We assessed the consequence of these enhancer  
104 deletions in hemizygous condition over *Fgf8* null alleles (either *Fgf8*<sup>null/+</sup> 17 or DEL(P-F8)  
105 <sup>6</sup>).

106 For the limb, four enhancers (CE58, CE59, CE61, CE66) are spread within a 40kb region  
107 in the introns of the neighbouring *Fbxw4* gene while only CE80 is located in the  
108 proximity of *Fgf8* (Fig1A). Previous experiments had demonstrated that mice carrying a  
109 deletion of the region containing the four distal enhancers abolishes limb *Fgf8*  
110 expression and causes similar defects to the conditional ablation of *Fgf8* in the limb. In  
111 contrast, all the mutants that we generated carrying single deletions of these putative  
112 enhancers were healthy and had limbs indistinguishable from their control littermates.  
113 These results were confirmed in more detail by skeletal preparations of e18.5 embryos  
114 (Fig1C). We also analysed the expression pattern of *Fgf8* at e10.5 using *in situ*  
115 hybridisation. At this stage *Fgf8* is strongly expressed in the morphologically well-  
116 defined AER of both the forelimb and the hindlimb (Fig1B). The AER expression pattern  
117 displayed by embryos carrying enhancer deletions was indistinguishable from their  
118 control littermates (Fig1D).

119 To further confirm this, we performed quantitative RT-qPCR analysis on dissected e10.5  
120 forelimbs of three deletion lines (DEL58, DEL61, DEL80, corresponding to deeply  
121 evolutionary conserved enhancers) and failed to detect significant change in *Fgf8* gene  
122 expression levels or in other limb patterning genes, which could have indicated  
123 compensatory effects (FigS2). Thus, from a pure functional viewpoint, each of those  
124 enhancers appears dispensable for the expression of *Fgf8* and subsequent development  
125 of the limb. Taken together, this demonstrates that the regulatory system that controls  
126 *Fgf8* limb expression *in vivo* is highly modular and displays extensive regulatory  
127 redundancy.

128

### 129 **A distant *Fgf8* enhancer is required for formation of the midbrain and cerebellum**

130 In the MHB, two of the putative enhancers (CE79 and CE80) are located within a 20kb  
131 region downstream of *Fgf8*, while the third one (CE64) is located at a distance of 120kb  
132 within an intron of the neighbouring gene *Fbxw4* (Fig1A). Using CRISPR/Cas9 zygote  
133 injections, we generated mice carrying single deletions of these enhancers as well as the  
134 double deletion of CE79 and CE80. We found no morphological differences between the  
135 DEL79, DEL80 or the compound DEL79-80 animals and their control littermates that

136 could be detected macroscopically in the brain. In contrast, DEL64 mice display a  
137 complete absence of midbrain and cerebellar structures visible at e18.5, phenocopying  
138 the conditional KO of *Fgf8* in the MHB <sup>26</sup>. A more detailed analysis of e18.5 brains using  
139 optical projection tomography (OPT) demonstrates the complete loss of superior  
140 colliculus, inferior colliculus, isthmus and cerebellum in the DEL64 mutants (Fig2,  
141 VideoS1). These analyses also confirmed the normal appearance of these structures in  
142 the DEL79, DEL80, and DEL79-80 mutants (Fig2, VideoS2-4). In summary, of the three  
143 MHB enhancers, only CE64 is essential for proper development of the MHB. Despite the  
144 sensitivity of the MHB-derived structures to mild-reduction of *Fgf8*-signalling from the  
145 IsO, which could result in various degrees of hypoplasia <sup>17,28</sup>, the two proximal  
146 enhancers 79 and 80 appear dispensable for the development of those structures.

147

#### 148 **Deletion of CE64 completely abolishes *Fgf8* expression in the MHB**

149 We further explored the spatial expression of *Fgf8* at e10.5 in all the generated MHB  
150 mutants (Fig3A-F). At this time point in development, the expression of *Fgf8* has been  
151 narrowed down to a sharply delimited band of cells at the border between the midbrain  
152 and anterior hindbrain. In the DEL64 embryos *Fgf8* expression was completely absent in  
153 the MHB and the morphology of these embryos already revealed the absence of a large  
154 portion of the midbrain (Fig3B). In DEL79, DEL80 and DEL79-80 embryos, *Fgf8*  
155 expression pattern and signal strength were similar to control embryos. Next, we  
156 performed *in situ* hybridisation analysis of *Fgf8* expression at the earliest stage of  
157 expression, e8.25, in DEL64 embryos. These analyses revealed a complete lack of *Fgf8*  
158 expression also in the initial expression phase (Fig3G-H). This indicates that CE64 is  
159 required and sufficient for proper initiation of *Fgf8* expression as well as subsequent  
160 maintenance.

161 Although *in situ* hybridisation revealed similar expression patterns between DEL79,  
162 DEL80 and DEL79-80 mutants as compared to control embryos, we sought to assess  
163 potential subtle quantitative changes in the expression levels. For this, we performed  
164 RT-qPCR on dissected MHB region from e10.5 embryos, for *Fgf8* and a set of genes  
165 known to be involved in this gene regulatory network.

166 Firstly, we noticed that mice heterozygous for a null *Fgf8* allele only showed a mild  
167 reduction of *Fgf8*. Instead of an expected 50% reduction, we measured that *Fgf8*  
168 expression in *Fgf8*<sup>null/+</sup> was 79% of wild-type level in the MHB, and 68% in the limb

169 (Fig3I, FigS2). This limited impact suggests that *Fgf8* expression is maintained, at least  
170 partially, by feedback mechanisms. In *Fgf8<sup>null/+</sup>* MHB, we found a decreased expression of  
171 *Spry2* and *Dusp6* (FigS3), two downstream targets of *Fgf8* that are part of negative  
172 feedback loops for Fgf-signalling<sup>32,33</sup>, suggesting that this circuit could account for  
173 sustained expression upon *Fgf8* gene dosage reduction.

174 Taking this potential compensation into account, in the enhancer deletion alleles we  
175 could detect a mild but significant decrease in expression of *Fgf8* as compared to the  
176 control animals for the DEL80 as well as the compound DEL79-80 (Fig3I). This decrease  
177 was accompanied by a small but significant decrease in *Dusp6*, *En1*, *En2*, *Fgf17*, *Spry1* for  
178 DEL80, and *Dusp6*, *Etv4*, *Fgfr1*, *Lmx1b*, *Pax2*, *Sp8*, *Spry1*, and *Spry2* for DEL79-80 (FigS3).  
179 The general tendency in these mutants is a minor down-regulation of the genes in the  
180 MHB regulatory network. Notably, the expression profiles of DEL80 and DEL79-80 tend  
181 to overlap and may indicate that most of the effects seen in the compound mutant is due  
182 to the deletion of CE80. In contrast, most genes investigated in the DEL79 embryos  
183 display a tendency to minor up-regulation that is significant for *Fgf17*, *Lmx1b*, *Otx2*,  
184 *Pax2*, *Pax6*, *Spry1*, and *Spry2* (FigS3). Taken together, these data demonstrate only minor  
185 contribution of CE79 and CE80 to *Fgf8* gene expression and hence underline the  
186 essential role of the main CE64 enhancer in MHB development. Thus, CE64 appears as  
187 the main enhancer of *Fgf8* expression in the MHB, that it is required and sufficient for  
188 the initiation of *Fgf8* expression, while both CE79 and CE80 are dispensable for MHB  
189 patterning.

190

### 191 ***In vivo* CRISPR/Cas9 screen identifies two distinct subunits required for CE64** 192 **enhancer function**

193 Given the crucial role of CE64 for the expression of *Fgf8* in the MHB we aimed to dissect  
194 how the regulatory logic of this enhancer is composed *in vivo*. To this end, we injected a  
195 new set of CRISPR gRNAs in different combinations together with *Cas9* mRNA in oocytes  
196 that had been *in vitro* fertilized using sperm from males heterozygous for the DEL(P-F8)  
197 allele (Fig4A). The fact that 50% of injected embryos carried DEL(P-F8) increased the  
198 yield of “informative” embryos (only deletion of one enhancer copy is required) and  
199 facilitated their unambiguous identification (reduced possible mosaicism). As disruption  
200 of CE64 function leads to a severe hypoplasia of the midbrain and cerebellum, we could  
201 directly screen F0 embryos at e18.5 for lack of these tissues (Fig4B) and identify regions

202 essential to CE64 function in embryos carrying DEL(P-F8) compound or homozygous  
203 targeted deletions. Using this system, we produced and analysed a large collection of  
204 deletions spanning different regions of CE64, performing *in vivo*, at the endogenous  
205 locus, the type of “enhancer-bashing” experiments that are typically carried out on out-  
206 of-context transgenic assays. All embryos produced were genotyped by PCR for targeted  
207 deletions and the breakpoints were sequenced. In addition, the embryos carrying  
208 deletions were genotyped with primers internal to the identified deletions in order to  
209 discard embryos carrying WT alleles due to mosaicism (Fig4C). In all, we identified 39  
210 informative alleles (TableS2).

211 This extensive panel of deletions allowed us to define three distinct elements in CE64, of  
212 which one is dispensable (64-A in Fig4E) and two (64-B and 64-C in Fig4E) are essential  
213 and required for proper enhancer function. Deleting any of the two essential regions 64-  
214 B or 64-C is sufficient to completely abrogate the development of the midbrain and  
215 anterior hindbrain region. Of these essential subunits, 64-B spans a region of  
216 approximately 700bp that is highly conserved among vertebrates (Fig4D, Fig6A).  
217 Intriguingly, deletions of sub-regions in 64-B demonstrated that considerable functional  
218 redundancy exists within this subunit. In fact, deleting two-thirds of 64-B is not  
219 sufficient to abolish proper midbrain and cerebellum formation (DEL-B3 in Fig4D) and  
220 any one third of this subunit is dispensable for its function (DEL-B2, DEL-B4, DEL-B5 in  
221 Fig4D). Of note, a 10kb insertion of a MusD retroelement as observed in the Dac2J strain  
222 (Fig4D), appear to have no impact on MHB development (Tugce Aktas, in preparation).  
223 Therefore, it seems that the regulatory information embedded in 64-B is modular and  
224 spread across the element, rather than organised as one continuous regulatory unit.  
225 Subunit 64-C is only 180bp long and located on the most telomeric side of CE64. It is  
226 conserved in tetrapods but not in fish. Consecutive deletions of sub-regions in 64-C do  
227 not cause any phenotype (DEL-C2, DEL-C3, DEL-C4 in Fig4, Fig6D), but remarkably, the  
228 deletion of merely 37bp in 64-C at the junction between 64-C2 and 64-C3 is sufficient to  
229 completely abrogate CE64 function (DEL-C5 in Fig4A, Fig 6D). This indicates that the  
230 37bp contains at least two critical, yet redundant elements.

231

### 232 **The functional subunits of CE64 are interdependent**

233 Next, we asked if 64-B and 64-C differ in their regulatory potential by performing  
234 transient transgenesis of a reporter construct carrying either CE64, 64-B or CE64



235 lacking 64-B or 64-C, respectively. The sequences were cloned upstream of a minimal  
236 promoter that by itself does not drive expression of the LacZ reporter gene. As expected,  
237 Tg(CE64) recapitulated the expression pattern published for CE64 in 3 out of 4  
238 transgenic embryos (Fig5C and FigS4, for comparison see Marinic *et al.*)<sup>6</sup>. However, for  
239 both Tg(64-DEL-B) and the Tg(64-DEL-C), no expression was detected in the MHB (0/8  
240 and 0/3 embryos respectively) (Fig5C, FigS4). Interestingly, some of the Tg(DEL-B)  
241 embryos (4/8) displayed a reproducible reporter expression in the anterior hindbrain  
242 (FigS4). This may indicate that 64-C has an intrinsic regulatory potential that is  
243 independent of 64-B for expression *per se* but which spatial position is shifted in  
244 presence of 64-B. In contrast, 64-B does not appear to have any autonomous activity in  
245 e10.5 embryos (0/4 embryos) (Fig5C, FigS4). Taken together, the transgenic assays  
246 indicate that although both 64-B and 64-C are required for the function of CE64, their  
247 intrinsic properties are not sufficient to drive spatial expression in the MHB on their  
248 own.

249 The transient transgenesis and CRISPR/*Cas9* deletion screen of F0 progeny at late stages  
250 of embryonic development precluded direct analysis of *Fgf8* gene expression at the time  
251 when the MHB patterns the prospective midbrain and hindbrain. In order to assess the  
252 contribution of each of the CE64 sub-units to *Fgf8* expression in the MHB during early  
253 stages we generated mouse lines carrying deletions of 64-B and 64-C. As expected, both  
254 lines completely lack midbrain and cerebellum at e18.5, confirming the results from the  
255 embryonic screen. Expression analysis by in situ hybridisation at e8.25 demonstrated  
256 that in both mutants, *Fgf8* gene expression fails to initiate and is completely absent from  
257 the MHB region (Fig5D). Altogether, these data demonstrate that the functional  
258 elements of CE64 are units that have reciprocal dependency in order to mediate proper  
259 regulatory input to *Fgf8*.

260

### 261 **Evolutionary conservation of CE64 sequence versus functional organisation.**

262 Conservation is a good predictor for identifying regulatory regions in the genome and a  
263 previous study has shown that the zebrafish region orthologous to CE64 can drive  
264 expression in the zebrafish MHB (dr10 in ref.<sup>31</sup>). Intriguingly, our functional analysis in  
265 mouse of CE64 sub-regions identified an essential part of the enhancer (64-C) that is not  
266 conserved in fish (Fig6A). In addition, transgenic analysis showed that the conserved 64-  
267 B element is unable to drive expression in the MHB by its own (Fig5C). We therefore

268 asked whether the orthologous region in fish could drive MHB expression in the mouse.  
269 To this end, we cloned CE64 from spotted gar, a species that is closer to mouse and  
270 humans in the vertebrate lineage and has not undergone the genome duplication that  
271 the teleost lineage has. Remarkably, the 350bp sequence from spotted gar could drive  
272 expression in the MHB region in 4 out of 4 embryos (Fig6B, FigS4), despite lacking a  
273 region orthologous to the mouse 64-C. The expression did not completely reproduce the  
274 expression of the full CE64 but was restricted to the MHB and dorsal part of the anterior  
275 hindbrain. It is also noteworthy that the zebrafish dr10 enhancer recapitulates the  
276 broad activity of mouse CE64 in the MHB region (as well as in the forebrain and tail  
277 bud), in the zebrafish transcriptional context. This raises the question to whether non-  
278 conserved sequences outside the 350bp core enhancer may encode additional  
279 information that would further increase the similarity in regulatory potential to mouse  
280 CE64.

281 To investigate the sequence composition of CE64, we used multiple alignments to define  
282 phylogenetic footprints, hence identifying highly conserved sub-regions of the enhancer  
283 that might represent where functional TF binding can occur. In 64-B, the high  
284 conservation of the sequence precluded identification of obvious putative TFBS, while in  
285 64-C we could define 4 conserved blocks of sequences resembling TFBS or TFBS clusters  
286 in length and composition (Fig6C, blue boxes, see alignments in FigS5). The 37bp  
287 deletion in 64-C abrogates two of these conserved blocks (red box in Fig6C and Fig6D),  
288 demonstrating that they are functionally important. Block #2 shares similarities with  
289 TCF/LEF binding sites (Fig6C), which can mediate responsiveness to Wnt-signalling, a  
290 known upstream inducer of *Fgf8* expression in the MHB <sup>34,35</sup>. Noteworthy, mouse 64-B  
291 also comprises a potential Wnt-TCF/LEF response element (sequence  
292 CAGTTTCAAAGGAA). Block #3 bears homologies to the consensus binding motif defined  
293 for En1/2 (Fig6C), two transcription factors specifically expressed in the MHB <sup>36,37</sup> and  
294 that contribute to *Fgf8* maintenance there <sup>38</sup>, as well to some extent to SOX proteins  
295 (Fig6C).

296 We then used these footprints to derive positional weight matrices (PWMs) and scan the  
297 spotted gar and zebrafish CE64 for corresponding motif occurrences. Only one of the  
298 two PWMs derived from the phylogenetic footprints in the 37bp deletion was detected  
299 in the spotted gar (block #3, Fig6C) or the zebrafish (block #2, Fig6C) CE64 (including  
300 the whole sequence tested in ref <sup>31</sup>, and its spotted gar ortholog). These analyses suggest

301 that although the orthologous CE64 elements that drive MHB expression in the teleost  
302 fishes and mammals may use different logics that could correspond to a rewiring of the  
303 *Fgf8* regulatory circuit.

304

305

## 306 **Discussion**

307 Shadow and distributed enhancers have been described as common features in the  
308 regulatory genome that could provide robustness to gene expression, by buffering it  
309 against environmental changes and possible genetic variation<sup>39,40</sup>. The *Fgf8* regulatory  
310 landscape is a prototypical example of the complexity of developmental gene regulation,  
311 which involves multiple enhancers with similar activity. By dissecting their function *in*  
312 *vivo* we found different acting logics within two sets of tissue-specific enhancers. In the  
313 limb, *Fgf8* AER expression results from the collective action of several enhancer modules  
314 with redundant activity (Fig7A). Noteworthy, the degree of conservation of the different  
315 AER enhancer does not seem to correlate with relative importance, and we do not see  
316 evidence that the “tetrapod” modules contribute specifically to the heterochronic shift  
317 associated with evolution of the AER from a primitive apical ectodermal fold<sup>41</sup>.  
318 Contrarily to a simple view, the progressive recruitment of new AER enhancer modules  
319 during tetrapod evolution did not simply reinforce expression by addition of accessory  
320 elements to an ancestral essential enhancer. It may have allowed a redistribution of  
321 functional roles between the new elements, enabling more complex rewiring of the  
322 expression control of this gene in the apical ectoderm of the limb, which could have  
323 contributed to a prolonged maintenance of the apical ectodermal ridge, an essential step  
324 in the evolution of tetrapod limbs<sup>41,42</sup>.

325 In the MHB, *Fgf8* expression is solely dependent on one enhancer and the others appear  
326 dispensable (Fig7A). Given the high conservation of CE79 and CE80 and their previous  
327 identification also as putative enhancers in the MHB in the zebrafish<sup>29-31</sup>, the finding  
328 that both are dispensable for normal development of the MHB region may be surprising.  
329 Still, it remains to be defined if those enhancers have important roles in other embryonic  
330 structures or later stages, and whether they may contribute to aspects of MHB function  
331 that cannot be assessed in a laboratory set-up (e. g. robustness to genetic or  
332 environmental variation).

333 Thorough dissection of the functional units of the essential MHB enhancer CE64 reveals  
334 a multi-layered organization, with separate units critical for its activity (Fig7B). The  
335 failure to initiate expression when deleting either of these regions demonstrates that  
336 their activities are interdependent (Fig7B). Our extensive *in vivo* screen of smaller  
337 deletions within CE64 nonetheless suggests that this enhancer can withstand relatively  
338 large sequence modifications, even in its evolutionary conserved parts. The small 37bp  
339 region, which deletion completely abrogates the function of the main MHB enhancer,  
340 thus causing loss of midbrain and cerebellum, identifies an essential and compact part of  
341 this enhancer. As removing overlapping bits of these 37bp does not lead to any  
342 phenotype, it demonstrates that redundancy is encoded in the regulatory architecture of  
343 the enhancer even at this scale and that most likely two sets of factors are involved  
344 (Fig7B). Sequence analysis suggests that Wnt-mediators LEF/TCF and En1/2 or Sox may  
345 be transcription factors associated with this activity.

346 Even though CE64 is highly conserved (to a degree that one could expect for an  
347 enhanceosome<sup>43</sup>), the deletion analysis shows that it maintains function despite  
348 substantial sequence changes in key elements of its organisation, which fits better with a  
349 flexible “billboard” model of enhancer logic<sup>44,45</sup>. Furthermore, the comparison of CE64  
350 elements from different species argues indeed that its activity can use different logic in  
351 distinct animals. One of the two critical regions is only present in tetrapods, suggesting  
352 that it has recently evolved. This implies that the interdependence between 64-B and  
353 64-C may have been acquired late during tetrapod evolution and may correspond to a  
354 change in *Fgf8* regulation. The fact that CE64 from spotted gar, in contrast to mouse 64-  
355 B, can drive expression in the MHB boundary of the mouse suggests that the spotted gar  
356 subunit gained regulatory potential or that some regulatory potential has been lost in  
357 the mouse enhancer subunit (Fig7C). We suggest that the addition of 64-C in the  
358 tetrapod lineage may have provided an additional layer of regulation that allowed for  
359 loss of ancestral features in 64-B, and eventually led to regulatory rewiring (Fig7C).  
360 Altogether, the dissection of 64 shows that it follows a complex logic involving multiple  
361 elements, which can both contribute to set up the very specific expression pattern of  
362 *Fgf8* in a given species, but as well allows for functional changes in its outcome on  
363 evolutionary timescales.

364 The complexity of developmental regulatory ensembles has made functional studies  
365 difficult. Here we demonstrate that Crispr/Cas9 *in vivo* deletion-screens can be very

366 efficient in functionally dissecting their components and address this type of complexity.  
367 If several high-throughput screens have been conducted in cell lines using CRISPR/*Cas9*  
368 <sup>46-52</sup> our study is the first large one carried out *in vivo* in mouse embryos. The use of a  
369 large deletion to perform the screen in hemizygous conditions is not mandatory, but  
370 provide both increased yield and facilitate analysis. By focussing on function and not on  
371 activity, our approach provides an important complement to the transgenic enhancer  
372 bashing that has been performed so far, enabling to narrow down the essential  
373 sequences required for *Fgf8* expression *in vivo*. Such an approach is particularly  
374 necessary, given the intricate interplay between different units or enhancer modules,  
375 both at large scale within an ensemble and within an enhancer. Our study demonstrates  
376 the feasibility and usefulness of such approaches to decipher the complex, flexible and  
377 multi-scale organisation of developmental gene regulatory ensembles.  
378  
379

## 380 **Methods**

381

### 382 **Animals and genotyping**

383 All animal procedures were performed according to principles and guidelines at the  
384 EMBL Heidelberg (Germany) and the Institute Pasteur (Paris, France). Genotyping was  
385 performed by PCR using primers flanking deletion breakpoints (Supplementary  
386 methods TableS1). The breakpoints for all F1 pups of stable lines and all F0 embryos  
387 from the embryonic screen were sequenced. For the embryonic screen, primers internal  
388 to each deletion were used to identify any mosaic embryos carrying both deletion and  
389 wild type alleles. For some very small deletions, surveyor assays were used in addition  
390 to PCR to exclude mosaicism. The balancer mouse strains DEL(P-F8) and *Fgf8*<sup>null</sup> were  
391 genotyped as previously described <sup>6</sup>.

392

### 393 **Targeted genome engineering, in vitro fertilization and embryo transfers**

394 Two CRISPR gRNA targets flanking each region of interest were designed using the  
395 CRISPR Design Tool (Zhang Lab, MIT) and are listed in Supplementary methods TableS2.  
396 *In vitro* transcription and cytoplasmic injections were performed essentially as  
397 described previously <sup>53</sup>. *Cas9* from px330 (Addgene) was subcloned downstream the T7  
398 promoter in a pGEMte plasmid. The target plasmid was linearized, gel purified and used  
399 as template for IVT. Templates for gRNAs were generated through PCR amplification.  
400 IVT was performed with mMESSAGE mMACHINE T7 ULTRA kit (Life Technologies) and  
401 MEGAshortscript T7 kit (Life Technologies), respectively, and RNA was purified using  
402 MEGAclear kit (Life Technologies). *Cas9* mRNA (100ng/ul) and chimeric gRNAs  
403 (50ng/ul) were diluted in microinjection buffer <sup>54</sup> and injected according to standard  
404 procedure. For deletion screening of embryos, *in vitro* fertilisation (IVF) was performed  
405 the night before injections. One DEL(P-F8) heterozygous male was euthanized, the  
406 epididymis was dissected out and incubated 25-45 minutes in fertiup medium at 37°C,  
407 5% CO<sub>2</sub>, allowing sperm to swim out. Meanwhile, oocytes from superovulated females  
408 were isolated into 200ul CARD media and 10-20 ul sperm was added before incubation  
409 over night.

410

### 411 **Cloning, transgenesis and X-gal staining**

412 Transgenesis was performed as previously described <sup>6</sup>. Briefly, fragments of interest  
413 were cloned upstream a  $\beta$ -globin-derived minimal promoter and a *LacZ* reporter gene.  
414 The Tg(DEL-B) and Tg(DEL-C) fragments were cloned from CRISPR-embryo DEL-AB-2  
415 and DEL-C respectively. Primers used for cloning are listed in TableS3. Linearized and  
416 gel-purified fragments were microinjected into fertilized mouse oocytes and transferred  
417 to pseudo-pregnant females (Institute Pasteur, Mouse Genetics Engineering). Embryos  
418 were collected at e10.5 and stained for  $\beta$ -galactosidase activity using standard protocol.  
419 Genotyping PCR was performed on yolk sac DNA.

420

#### 421 **Optical projection tomography**

422 Embryonic brains were dissected free at e18.5, fixed in 4% PFA O/N and prepared for  
423 OPT scanning <sup>55</sup>. Each specimen was scanned using the Bioptonics 3001 OPT scanner  
424 with a resolution of 1024×1024 pixels and reconstructed with the NRecon version  
425 1.6.9.18 (Skyscan) software. Post-acquisition alignment values for reconstructions were  
426 calculated using LLS- Gradient based A-value tuning <sup>56</sup>. Screenshots were exported from  
427 OPT volume renderings generated in Drishti v2.6.3 <sup>57</sup> and processed in Photoshop CS5  
428 version 9.0.2 (Adobe). All image adjustments were applied equally to entire images and  
429 occasional artefacts such as fibers or dust were digitally removed.

#### 430 **Gene expression analysis**

431 In situ hybridisation was performed according to standard protocols with previously  
432 published *Fgf8* probe <sup>58</sup>. For RT-qPCR, the MHB-region was dissected from e10.5  
433 embryos and total RNA was extracted using the RNAeasy (Qiagene) kit. cDNA was  
434 prepared using the ProtoScript First Strand cDNA Synthesis Kit (New England Biolabs)  
435 with random primers. For each reaction, 150-200ng RNA was used. RT-PCR was  
436 performed according to manufacturers protocol on a GE48.48 IFC (Fluidigm) using  
437 SsoFast EvaGreen Supermix with low ROX (Fluidigm). Before RT-PCR, 10 (MHB) or 14  
438 (limb) cycles of preamplification (Fluidigm PreAmp Master Mix) was performed using  
439 15ng of input cDNA. Preamplified DNA was diluted 5 (MHB) or 10 (limb) times before  
440 RT-PCR reaction. Primers used are listed in (Supplementary methods TableS4).

441

#### 442 **Motif analysis**

443 For phylogenetic footprints, sequences of interest were retrieved from pre-calculated  
444 alignments at UCSC or Ensembl genome browsers; realigned using MUSCLE, and PWMs  
445 were calculated from these alignments. Motif analysis was performed using the online  
446 interface of the MEME suite <sup>59</sup>.

447

#### 448 **Acknowledgements**

449 We are grateful to EMBL Genecore as well as to the Technology Core of the Center for  
450 Translational Science (CRT) at Institute Pasteur for support in conducting this study. We  
451 thank the DKFZ light microscopy facility and F. Bestvater for access to optical projection  
452 tomography equipment. We thank I. Braasch and H. Marlow for providing spotted gar  
453 tissue and extracted DNA, respectively. We thank greatly Y. Petersen (EMBL transgene  
454 facility) and all members of the animal facilities at both EMBL Heidelberg and Institute  
455 Pasteur for their help.

456

#### 457 **Author contributions**

458 F.S conceived the project and A.H. and F.S. designed the experimental strategies. A.H.  
459 performed or supervised all experiments. K.L. and S.B contributed to mouse embryos  
460 injections and transfers, and *in situ* hybridisation and skeletal preparations, respectively.  
461 F.L. produced DEL-B and DEL-C mutant mouse lines as well as transgenic LacZ reporter  
462 embryos; A.H. and F.S. wrote the paper with input of all authors.

463

464

#### 465 **References**

466

- 467 1. Lettice, L. A. *et al.* Development of five digits is controlled by a bipartite long-range  
468 cis-regulator. *Development* **141**, 1715–1725 (2014).
- 469 2. Benko, S. *et al.* Highly conserved non-coding elements on either side of SOX9  
470 associated with Pierre Robin sequence. *Nat. Genet.* **41**, 359–364 (2009).
- 471 3. Bagheri-Fam, S. *et al.* Long-range upstream and downstream enhancers control  
472 distinct subsets of the complex spatiotemporal Sox9 expression pattern. *Dev. Biol.*  
473 **291**, 382–397 (2006).
- 474 4. McBride, D. J., Buckle, A., van Heyningen, V. & Kleinjan, D. A. DNaseI  
475 hypersensitivity and ultraconservation reveal novel, interdependent long-range  
476 enhancers at the complex Pax6 cis-regulatory region. *PLoS ONE* **6**, e28616 (2011).
- 477 5. Montavon, T. *et al.* A Regulatory Archipelago Controls Hox Genes Transcription in  
478 Digits. *Cell* **147**, 1132–1145 (2011).
- 479 6. Marinić, M., Aktas, T., Ruf, S. & Spitz, F. An Integrated Holo-Enhancer Unit Defines



- 480 Tissue and Gene Specificity of the Fgf8 Regulatory Landscape. *Dev. Cell* **24**, 530–  
481 542 (2013).
- 482 7. Pennacchio, L. A. *et al.* In vivo enhancer analysis of human conserved non-coding  
483 sequences. *Nature* **444**, 499–502 (2006).
- 484 8. Visel, A. *et al.* ChIP-seq accurately predicts tissue-specific activity of enhancers.  
485 *Nature* **457**, 854–858 (2009).
- 486 9. Barolo, S. Shadow enhancers: Frequently asked questions about distributed cis-  
487 regulatory information and enhancer redundancy. *BioEssays* **34**, 135–141 (2011).
- 488 10. Ahituv, N. *et al.* Deletion of ultraconserved elements yields viable mice. *PLoS Biol.*  
489 **5**, e234 (2007).
- 490 11. Cretekos, C. J. *et al.* Regulatory divergence modifies limb length between  
491 mammals. *Genes Dev.* **22**, 141–151 (2008).
- 492 12. Xiong, N., Kang, C. & Raulet, D. H. Redundant and Unique Roles of Two Enhancer  
493 Elements in the TCR $\gamma$  Locus in Gene Regulation and  $\gamma\delta$  T Cell Development.  
494 *Immunity* **16**, 453–463 (2002).
- 495 13. Wiersma, E. J., Ronai, D., Berru, M., Tsui, F. W. L. & Shulman, M. J. Role of the  
496 Intronic Elements in the Endogenous Immunoglobulin Heavy Chain Locus. *J. Biol.*  
497 *Chem.* **274**, 4858–4862 (1999).
- 498 14. Danielian, P. S., Echelard, Y., Vassileva, G. & McMahon, A. P. A 5.5-kb Enhancer Is  
499 both Necessary and Sufficient for Regulation of Wnt-1 Transcription in Vivo. *Dev.*  
500 *Biol.* **192**, 300–309 (1997).
- 501 15. Fiering, S. *et al.* Targeted deletion of 5'HS2 of the murine beta-globin LCR reveals  
502 that it is not essential for proper regulation of the beta-globin locus. *Genes Dev.* **9**,  
503 2203–2213 (1995).
- 504 16. Yanagisawa, H., Clouthier, D. E., Richardson, J. A., Charite, J. & Olson, E. N. Targeted  
505 deletion of a branchial arch-specific enhancer reveals a role of dHAND in  
506 craniofacial development. *Development* **130**, 1069–1078 (2003).
- 507 17. Meyers, E. N., Lewandoski, M. & Martin, G. R. An Fgf8 mutant allelic series  
508 generated by Cre- and Flp-mediated recombination. *Nat. Genet.* **18**, 136–141  
509 (1998).
- 510 18. Frank, D. U. *et al.* An Fgf8 mouse mutant phenocopies human 22q11 deletion  
511 syndrome. *Development* **129**, 4591–4603 (2002).
- 512 19. Macatee, T. L. *et al.* Ablation of specific expression domains reveals discrete  
513 functions of ectoderm- and endoderm-derived FGF8 during cardiovascular and  
514 pharyngeal development. *Development* **130**, 6361–6374 (2003).
- 515 20. Moon, A. M., Moon, A. M., Capecchi, M. R. & Capecchi, M. R. Fgf8 is required for  
516 outgrowth and patterning of the limbs. *Nat. Genet.* **26**, 455–459 (2000).
- 517 21. Lewandoski, M., Sun, X. & Martin, G. R. Fgf8 signalling from the AER is essential for  
518 normal limb development. *Nat. Genet.* **26**, 460–463 (2000).
- 519 22. Perantoni, A. O. *et al.* Inactivation of FGF8 in early mesoderm reveals an essential  
520 role in kidney development. *Development* **132**, 3859–3871 (2005).
- 521 23. Crossley, P. H., Martinez, S. & Martin, G. R. Midbrain development induced by FGF8  
522 in the chick embryo. *Nature* **380**, 66–68 (1996).
- 523 24. Irving, C. & Mason, I. Signalling by FGF8 from the isthmus patterns anterior  
524 hindbrain and establishes the anterior limit of Hox gene expression. *Development*  
525 **127**, 177–186 (2000).
- 526 25. Martinez, S., Crossley, P. H., Cobos, I., Rubenstein, J. L. & Martin, G. R. FGF8 induces  
527 formation of an ectopic isthmus organizer and isthmo-cerebellar development via a  
528 repressive effect on Otx2 expression. *Development* **126**, 1189–1200 (1999).

- 529 26. Chi, C. L., Martinez, S., Wurst, W. & Martin, G. R. The isthmic organizer signal FGF8  
530 is required for cell survival in the prospective midbrain and cerebellum.  
531 *Development* **130**, 2633–2644 (2003).
- 532 27. Sato, T. & Joyner, A. L. The duration of Fgf8 isthmic organizer expression is key to  
533 patterning different tectal-isthmo-cerebellum structures. *Development* **136**,  
534 3617–3626 (2009).
- 535 28. Basson, M. A. *et al.* Specific regions within the embryonic midbrain and cerebellum  
536 require different levels of FGF signaling during development. *Development* **135**,  
537 889–898 (2008).
- 538 29. Inoue, F. *et al.* Genomic organization, alternative splicing, and multiple regulatory  
539 regions of the zebrafish *fgf8* gene. *Dev. Growth Differ.* **48**, 447–462 (2006).
- 540 30. Inoue, F., Parvin, M. S. & Yamasu, K. Transcription of *fgf8* is regulated by activating  
541 and repressive cis-elements at the midbrain–hindbrain boundary in zebrafish  
542 embryos. *Dev. Biol.* **316**, 471–486 (2008).
- 543 31. Komisarczuk, A. Z., Kawakami, K. & Becker, T. S. Cis-regulation and chromosomal  
544 rearrangement of the *fgf8* locus after the teleost/tetrapod split. *Dev. Biol.* **336**,  
545 301–312 (2009).
- 546 32. Chambers, D., Medhurst, A. D., Walsh, F. S., Price, J. & Mason, I. Differential display  
547 of genes expressed at the midbrain - hindbrain junction identifies *sprouty2*: an  
548 FGF8-inducible member of a family of intracellular FGF antagonists. *Mol. Cell.*  
549 *Neurosci.* **15**, 22–35 (2000).
- 550 33. Li, C., Scott, D. A., Hatch, E., Tian, X. & Mansour, S. L. *Dusp6* (*Mkp3*) is a negative  
551 feedback regulator of FGF-stimulated ERK signaling during mouse development.  
552 *Development* **134**, 167–176 (2007).
- 553 34. McMahon, A. P. & Bradley, A. The *Wnt-1* (*int-1*) proto-oncogene is required for  
554 development of a large region of the mouse brain. *Cell* **62**, 1073–1085 (1990).
- 555 35. McMahon, A. P., Joyner, A. L., Bradley, A. & McMahon, J. A. The midbrain-hindbrain  
556 phenotype of *Wnt-1*-/*Wnt-1*- mice results from stepwise deletion of engrailed-  
557 expressing cells by 9.5 days postcoitum. *Cell* **69**, 581–595 (1992).
- 558 36. Davis, C. A., Noble-Topham, S. E., Rossant, J. & Joyner, A. L. Expression of the  
559 homeo box-containing gene *En-2* delineates a specific region of the developing  
560 mouse brain. *Genes Dev.* **2**, 361–371 (1988).
- 561 37. Davis, C. A. & Joyner, A. L. Expression patterns of the homeo box-containing genes  
562 *En-1* and *En-2* and the proto-oncogene *int-1* diverge during mouse development.  
563 *Genes Dev.* **2**, 1736–1744 (1988).
- 564 38. Liu, A. & Joyner, A. L. *EN* and *GBX2* play essential roles downstream of FGF8 in  
565 patterning the mouse mid/hindbrain region. *Development* **128**, 181–191 (2001).
- 566 39. Frankel, N. *et al.* Phenotypic robustness conferred by apparently redundant  
567 transcriptional enhancers. *Nature* **466**, 490–493 (2010).
- 568 40. Perry, M. W., Boettiger, A. N., Bothma, J. P. & Levine, M. Shadow enhancers foster  
569 robustness of *Drosophila* gastrulation. *Curr. Biol.* **20**, 1562–1567 (2010).
- 570 41. Schneider, I. & Shubin, N. H. The origin of the tetrapod limb: from expeditions to  
571 enhancers. *Trends Genet.* **29**, 419–426 (2013).
- 572 42. Gehrke, A. R. & Shubin, N. H. Cis-regulatory programs in the development and  
573 evolution of vertebrate paired appendages. *Semin. Cell Dev. Biol.* **57**, 31–39 (2016).
- 574 43. Thanos, D. & Maniatis, T. Virus induction of human IFN beta gene expression  
575 requires the assembly of an enhanceosome. *Cell* **83**, 1091–1100 (1995).
- 576 44. Kulkarni, M. M. & Arnosti, D. N. Information display by transcriptional enhancers.  
577 *Development* **130**, 6569–6575 (2003).

- 578 45. Arnosti, D. N. & Kulkarni, M. M. Transcriptional enhancers: Intelligent  
579 enhanceosomes or flexible billboards? *J. Cell. Biochem.* **94**, 890–898 (2005).  
580 46. Rajagopal, N. *et al.* High-throughput mapping of regulatory DNA. *Nat. Biotechnol.*  
581 **34**, 167–174 (2016).  
582 47. Canver, M. C. *et al.* BCL11A enhancer dissection by Cas9-mediated in situ  
583 saturating mutagenesis. *Nature* **527**, 192–+ (2015).  
584 48. Vierstra, J. *et al.* Functional footprinting of regulatory DNA. *Nat. Methods* (2015).  
585 doi:10.1038/nmeth.3554  
586 49. Sanjana, N. E. *et al.* High-resolution interrogation of functional elements in the  
587 noncoding genome. *Science* **353**, 1545–1549 (2016).  
588 50. Fulco, C. P. *et al.* Systematic mapping of functional enhancer-promoter  
589 connections with CRISPR interference. *Science* **354**, 769–773 (2016).  
590 51. Diao, Y. *et al.* A tiling-deletion-based genetic screen for cis-regulatory element  
591 identification in mammalian cells. *Nat. Methods* **14**, 629–635 (2017).  
592 52. Korkmaz, G. *et al.* Functional genetic screens for enhancer elements in the human  
593 genome using CRISPR-Cas9. *Nat. Biotechnol.* **34**, 192–198 (2016).  
594 53. Wang, H. *et al.* One-step generation of mice carrying mutations in multiple genes  
595 by CRISPR/Cas-mediated genome engineering. *Cell* **153**, 910–918 (2013).  
596 54. Schedl, A. *et al.* A Method for the Generation of Yac Transgenic Mice by Pronuclear  
597 Microinjection. *Nucl. Acids Res.* **21**, 4783–4787 (1993).  
598 55. Sharpe, J. *et al.* Optical projection tomography as a tool for 3D microscopy and  
599 gene expression studies. *Science* **296**, 541–545 (2002).  
600 56. Cheddad, A., Svensson, C., Sharpe, J., Georgsson, F. & Ahlgren, U. Image Processing  
601 Assisted Algorithms for Optical Projection Tomography. *IEEE Trans Med Imaging*  
602 **31**, 1–15 (2012).  
603 57. Limaye, A. Drishti: a volume exploration and presentation tool. in (ed. Stock, S. R.)  
604 **8506**, 85060X–85060X–9 (SPIE, 2012).  
605 58. Crossley, P. H. & Martin, G. R. The mouse *Fgf8* gene encodes a family of  
606 polypeptides and is expressed in regions that direct outgrowth and patterning in  
607 the developing embryo. *Development* **121**, 439–451 (1995).  
608 59. Bailey, T. L., Johnson, J., Grant, C. E. & Noble, W. S. The MEME Suite. *Nucl. Acids Res.*  
609 **43**, W39–W49 (2015).

610  
611  
612

## 613 **Figure legends**

614

615 **Fig1. The limb AER elicits extensive regulatory redundancy.** (A) Schematic  
616 representation of the two sets of conserved elements directing expression in the AER  
617 (blue), and in the MHB (green). (B) In situ hybridization with riboprobe against *Fgf8*  
618 mRNA. Arrowheads and arrow indicate AER and MHB, respectively. (C)  
619 Photomicrograph of alizarin-red/alcian-blue stained e18.5 forelimbs from control and  
620 AER enhancer deletion embryos. (D) In situ hybridization of control and AER enhancer  
621 deletion embryos at e10.5 with riboprobe against *Fgf8*. All mutant embryos display  
622 expression patterns indistinguishable from their littermate controls.

623

624 **Fig2. One main enhancer is required for Fgf8 expression in the MHB.** (A to J'') OPT  
625 generated volume renderings of e18.5 brains from control (A, F, F', F''), DEL64 (B, G, G',  
626 G''), DEL79 (C, H, H', H''), DEL80 (D, I, I', I'') and DEL79-80 (E, J, J', J'') mutants. Signal is  
627 based on tissue autofluorescence. Control brains, DEL79, DEL80 and DEL79-80 mutants  
628 display a well-developed midbrain and cerebellar anlage while DEL64 brains display  
629 severe hypoplasia of midbrain and cerebellum. (F to J) Midsagittal digital dissection  
630 reveal complete loss of all MHB derived structures in the DEL64 mutant. (F' to J'') Close-  
631 up of boxed area in (F to J). Brains have been pseudocolored in (F'' to J''): dark blue –  
632 superior colliculus; red – inferior colliculus; yellow – isthmus; green – cerebellum; light  
633 blue – choroid plexus. Scalebar in (A-J) is 1mm. MB, midbrain; Cb, cerebellum.

634

635 **Fig3. CE64 is required and sufficient for initiation and maintenance of Fgf8**  
636 **expression in the MHB.** (A to F) *In situ* hybridization against *Fgf8* mRNA in e10.5  
637 embryos from control (A, E), DEL64 (B), DEL79 (C), DEL80 (D) and DEL79-80 (F)  
638 mutants. Note the complete lack of *Fgf8* expression in the MHB of DEL64 (B) embryos as  
639 compared to controls (A). Brain tissue is markedly reduced already at this stage in  
640 DEL64 embryos (B). (G and H) *In situ* hybridization of control and DEL64 enhancer  
641 deletion embryos at e8.25 with riboprobe against *Fgf8*. No expression is detected in the  
642 DEL64 embryos. (I) Relative expression of *Fgf8* mRNA levels in dissected MHB region  
643 from WT (n=11), DEL79 (n=10), DEL80 (n=12), and DEL79-80 (n=3) e10.5 embryos as  
644 compared to *Fgf8*<sup>null/+</sup> (n=11, 11, 10, 5) control littermates. Individual data point,  
645 mean±SEM are indicated. \*p<0.05, n. s. = not significant (two-tailed Student's *t*-test).

646

647 **Fig4. Two distinct subunits with internal redundancy are required for CE64**  
648 **function.** (A) Schematic representation of the CRISPR screen setup. Oocytes were  
649 fertilized with sperm carrying one DEL(P-F8) allele (bottom) and 2 gRNAs were  
650 simultaneously injected with *Cas9* mRNA. (B) Brain morphology of F0 embryos was  
651 examined at e18.5 and all embryos were genotyped according to strategy in (C) to  
652 identify breakpoints and possible mosaicism. (D) Representation of the panel of  
653 deletions generated. The *in vivo* CRISPR/*Cas9* screen defined two indispensable subunits  
654 of CE64 (DEL-B and DEL-C). Removing overlapping bits within these units (DEL-B2  
655 through DEL-B5, DEL-C2 through DEL-C4) does not provoke any phenotype. The

656 smallest deletion causing lack of MHB derived structures is merely 37bp (DEL-C5). Red  
657 cross indicates loss of MHB derived tissues and green tick indicates normal brain  
658 morphology. (E) Schematic representation of the functional units of CE64. Both 64-B  
659 and 64-C are indispensable for CE64 function, while 64-A is not required. Functional  
660 redundancy is encoded within these subunits although a deletion of only 37bp is enough  
661 to abrogate the function of 64-C.

662

663 **Fig5. The function of 64-B and 64-C is interdependent.** (A) Schematic of transgenic  
664 reporter construct containing *LacZ*, a minimal promoter and the putative enhancer  
665 sequence of interest. (B) Table of constructs used for transgenesis, the CE64 subunits  
666 included and the number of embryos displaying reporter expression for each construct.  
667 (C) Photomicrographs of representative embryos stained for *LacZ* activity. Reporter  
668 expression in the MHB is only detected in wt Tg(CE64) embryos. Note the staining that  
669 is present in the anterior hindbrain of some of the Tg(DEL-B) embryos. Tg(DEL-C) and  
670 Tg(64-B) do not manifest any reproducible reporter expression. (D) *In situ* hybridization  
671 of control, DEL-B, and DEL-C deletion embryos at e8.25 with riboprobe against *Fgf8*.  
672 Expression is undetectable in both enhancer subunit deletions. Blue box indicates *LacZ*  
673 reporter gene in (A). In all panels, light green, green and dark green boxes indicate 64-A,  
674 64-B, and 64-C subunits, respectively.

675

676 **Fig6. Cross-species comparison reveals non-conserved essential features of mouse**  
677 **of CE64.** (A) Sequence conservation of CE64 across species. 64-B is conserved from fish  
678 to mammals while 64-C is conserved among tetrapods. (B) Photomicrograph of a  
679 transgenic embryo injected with a minimal reporter construct including spotted gar  
680 CE64 and stained for *LacZ* activity. Note that only 64-B is conserved in the spotted gar  
681 CE64. Arrowhead indicates the MHB. (C) Upper panel: sequence conservation score of  
682 64-C. Blue boxes indicate highly conserved blocks. Red box indicate the smallest deletion  
683 that abrogates CE64 function. Middle panel: phylogenetic footprints generated from  
684 multiple sequence alignments corresponding to conserved block #2 and #3. The red  
685 bars indicate the breakpoints of the two smallest phenotype-causing deletions. Lower  
686 panel: PWMs of Tcf/Lef1, En1/2 and Sox proteins display similarities to the generated  
687 phylogenetic footprints. (D) Overview of small deletions in 64-C from the CRISPR/*Cas9*

688 screen. Red box indicates 37bp depicted in (C). Red cross indicates loss of MHB derived  
689 tissues and green tick indicates normal brain morphology.

690

691 **Fig7. Two modes of regulatory redundancy provide robustness to *Fgf8* gene**

692 **expression. (A)** Schematic representation of enhancer activity in the MHB and the AER.

693 In the MHB, one main enhancer is required and sufficient to direct *Fgf8* expression

694 (upper panel). In the limb AER, a collective of redundant enhancers, each by themselves

695 dispensable, directs gene expression (lower panel). Blue ovals: AER enhancers, green

696 ovals: MHB enhancers (B) Schematic of the mouse CE64 and its subunits. CE64 is

697 composed of two essential regulatory units that are reciprocally dependent and cannot

698 alone direct expression in the MHB. Both of the regulatory subunits exert functional

699 redundancy within themselves. This redundancy may be encoded by similar TFBS or

700 recurrent DNA motifs in 64-B, while in 64-C it is encoded by two distinct DNA signatures

701 (blue circle, yellow square) that reciprocally can buffer the loss of each other (C) Two

702 scenarios for CE64 evolution. Upper panel: both spotted gar and the tetrapod lineage

703 independently gained MHB regulatory activity, spotted gar within the ancestral

704 enhancer (64-B in mouse) and tetrapods by addition of a new subunit (64-C). Lower

705 panel: spotted gar CE64 retain an autonomous MHB regulatory activity in the absence of

706 64-C while in the tetrapod lineage, 64-B appears to have lost its autonomous activity and

707 64-C has been added to the regulatory wiring. Green area represents autonomous

708 regulatory activity and dashed green non-autonomous activity.

709

710

711

Fig1

**a** bioRxiv preprint doi: <https://doi.org/10.1101/2020.03.03.966796>; this version posted March 3, 2020. The copyright holder for this preprint (which was not certified by peer review) is the author/funder, who has granted bioRxiv a license to display the preprint in perpetuity. It is made available under aCC-BY-NC-ND 4.0 International license.

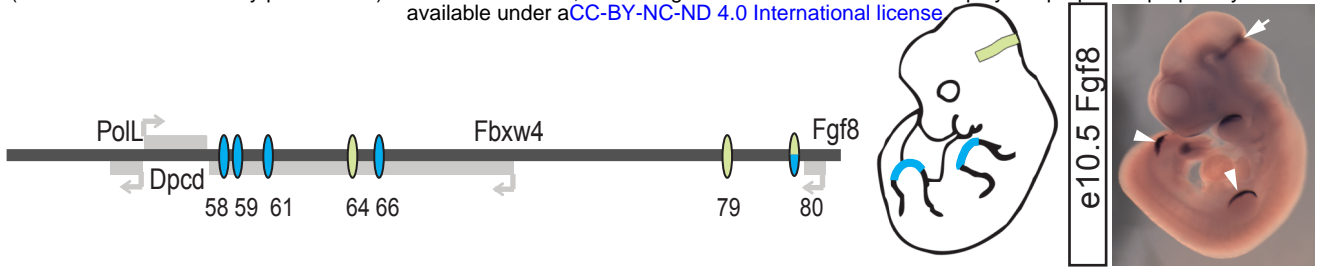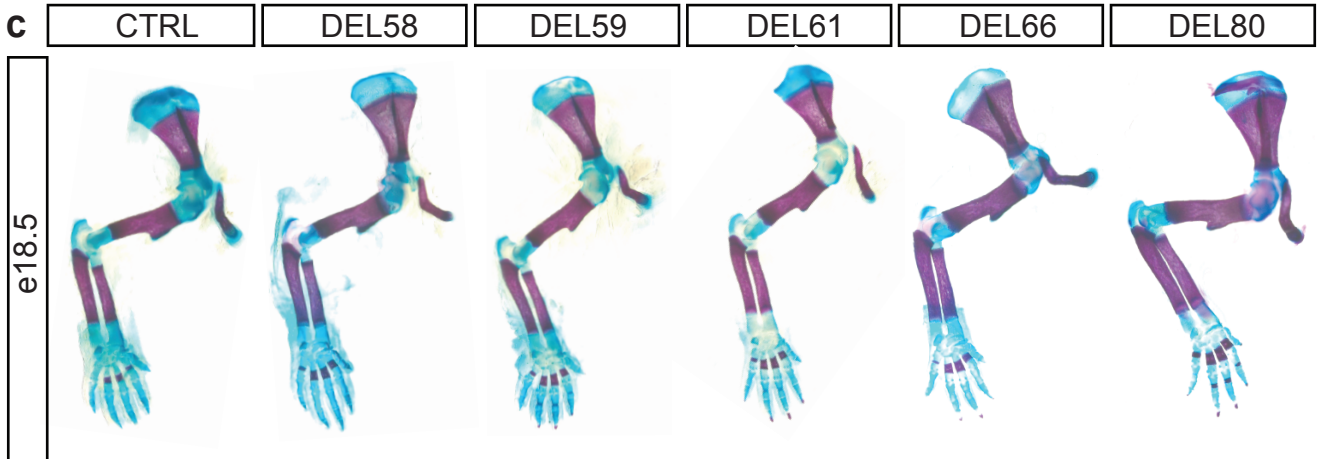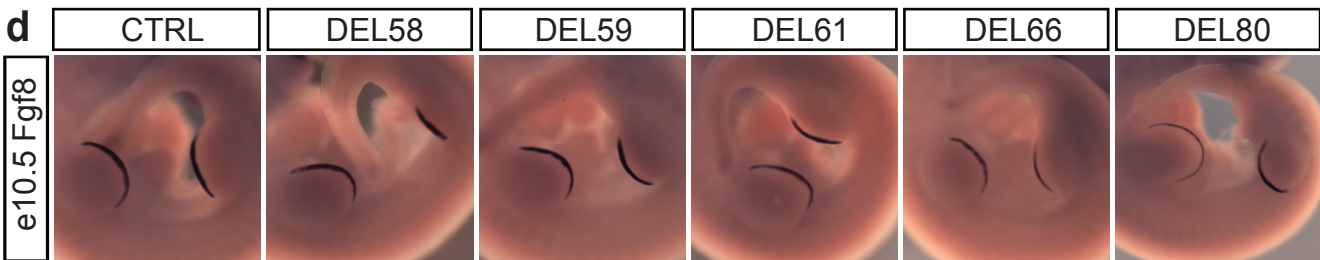

Fig2

bioRxiv preprint doi: <https://doi.org/10.1101/2020.03.03.966796>; this version posted March 3, 2020. The copyright holder for this preprint (which was not certified by peer review) is the author/funder, who has granted bioRxiv a license to display the preprint in perpetuity. It is made available under a [CC-BY-NC-ND 4.0 International license](#).

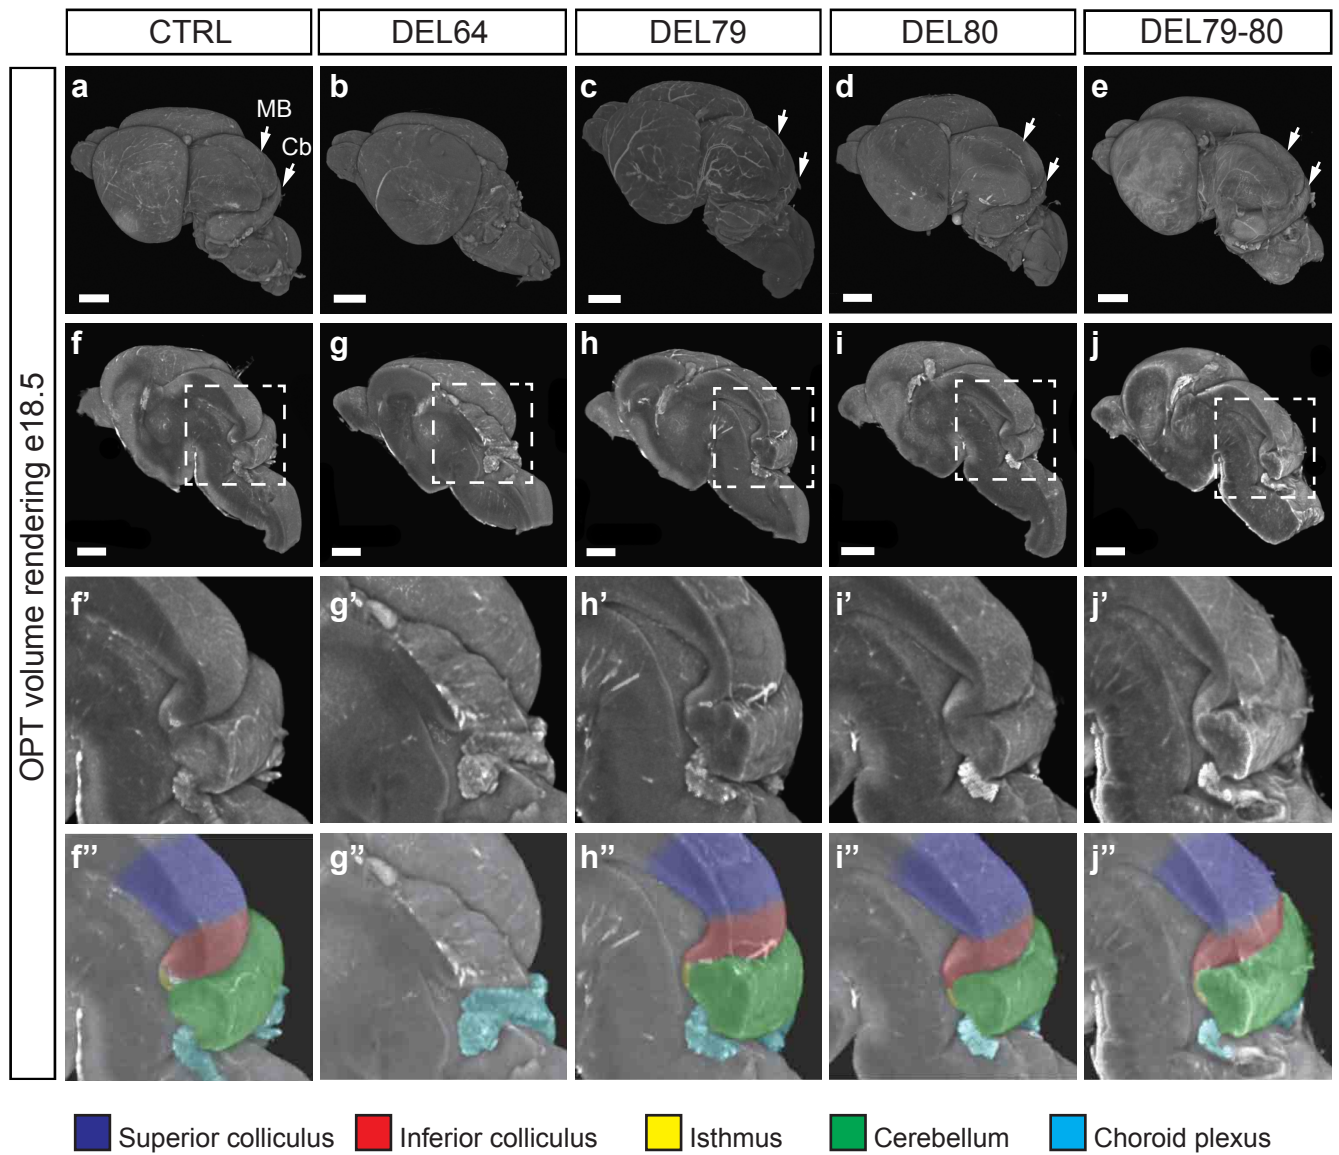



Fig3

bioRxiv preprint doi: <https://doi.org/10.1101/2020.03.03.966796>; this version posted March 3, 2020. The copyright holder for this preprint (which was not certified by peer review) is the author/funder, who has granted bioRxiv a license to display the preprint in perpetuity. It is made available under a [CC-BY-NC-ND 4.0 International license](#).

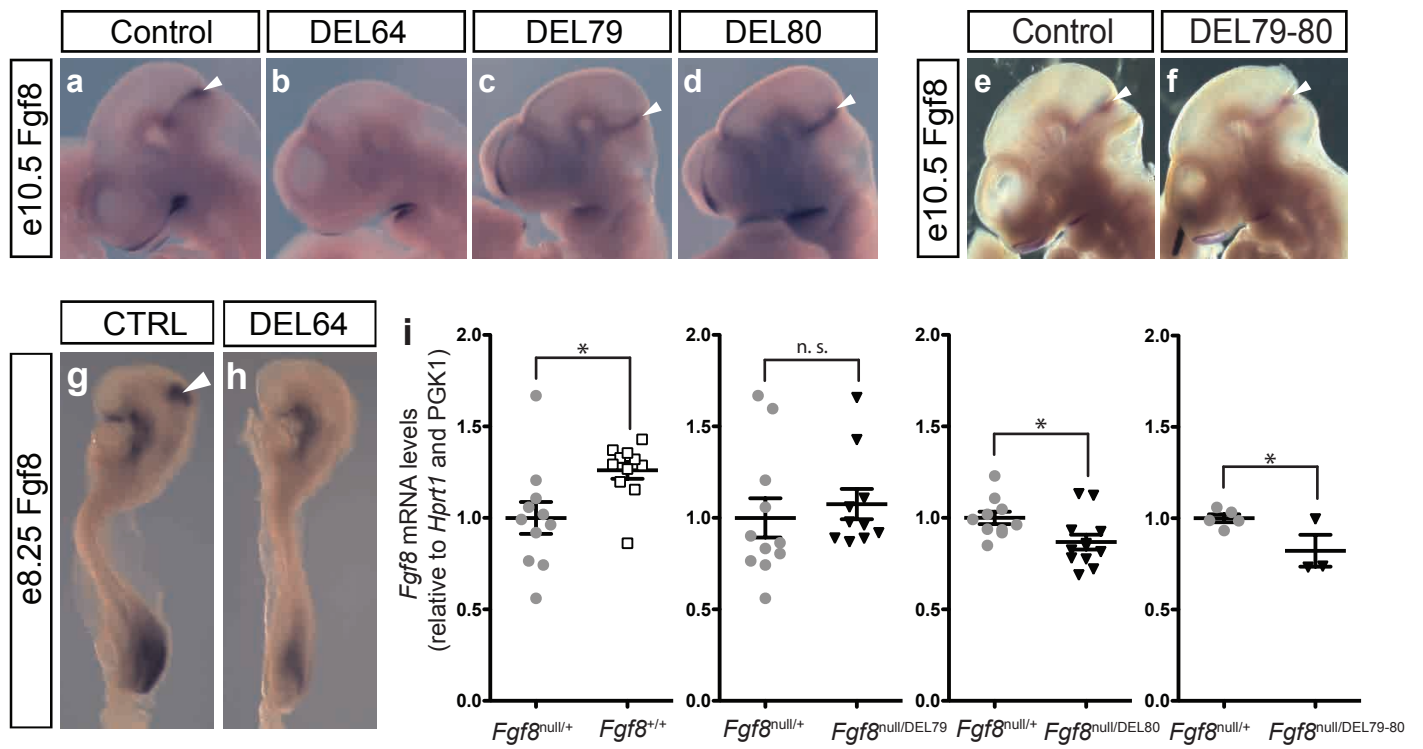

Fig4

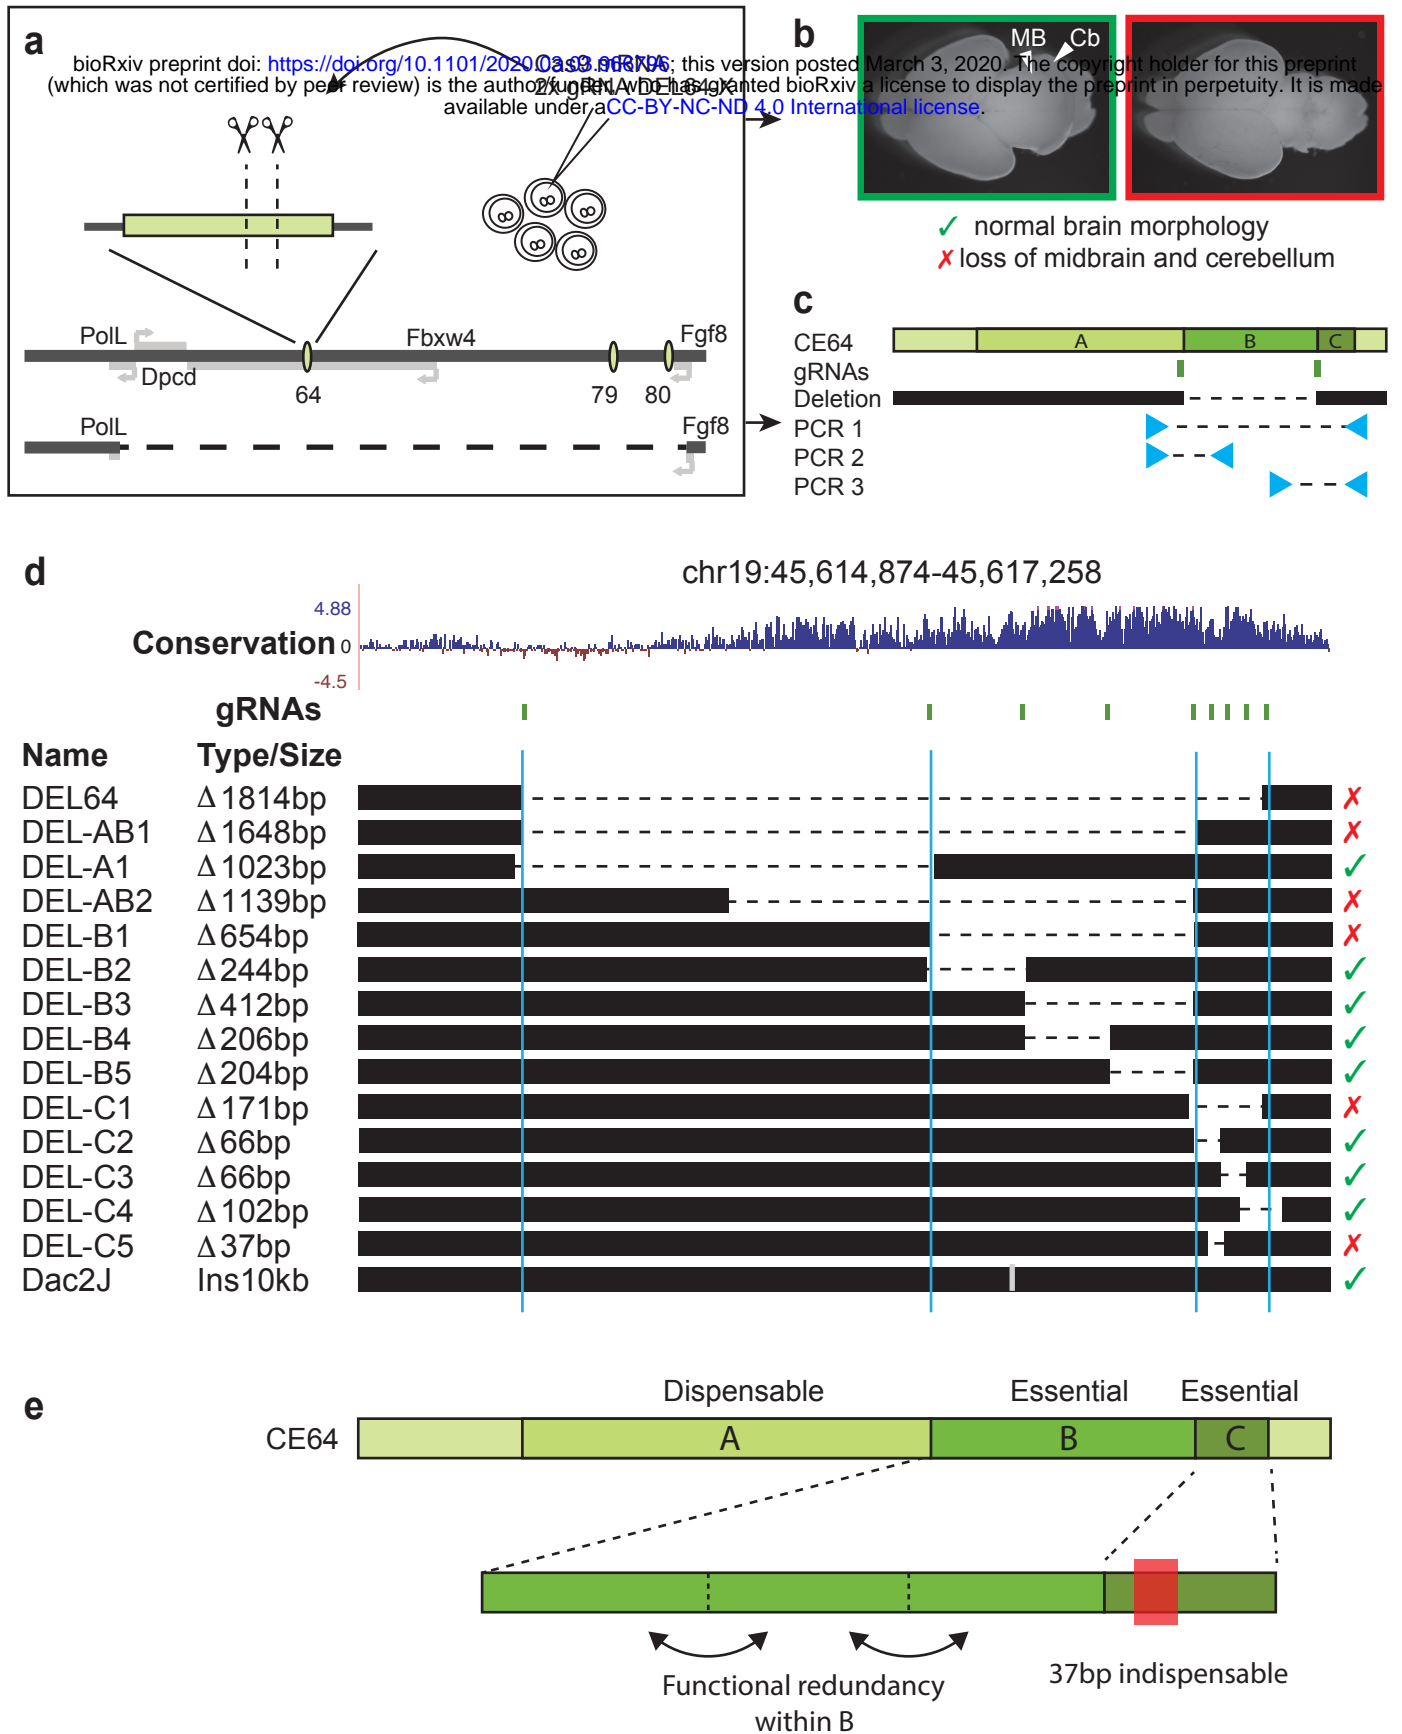

Fig5

**a** bioRxiv preprint doi: <https://doi.org/10.1101/2020.03.03.966796>; this version posted March 3, 2020. The copyright holder for this preprint (which was not certified by peer review) is the author/funder, who has granted bioRxiv a license to display the preprint in perpetuity. It is made available under aCC-BY-NC-ND 4.0 International license.

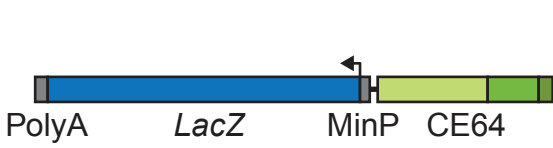

| Construct | Elements | MHB staining | HB staining |
|-----------|----------|--------------|-------------|
| Tg(CE64)  |          | 3/4          | 3/4         |
| Tg(DEL-B) |          | 0/8          | 4/8         |
| Tg(DEL-C) |          | 0/3          | 0/3         |
| Tg(64-B)  |          | 0/4          | 1/4         |

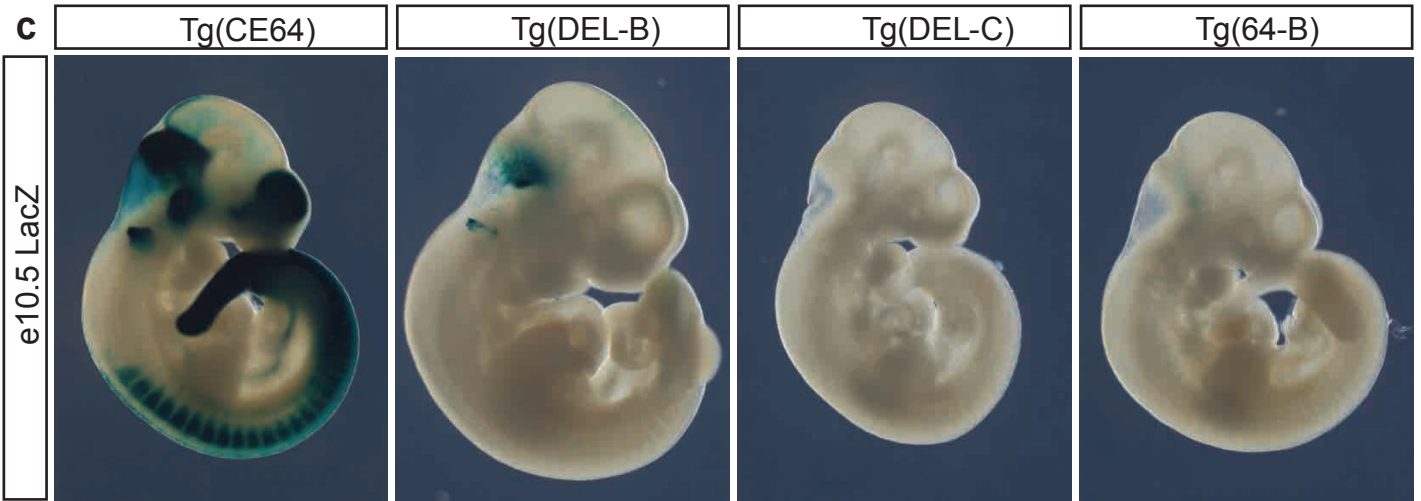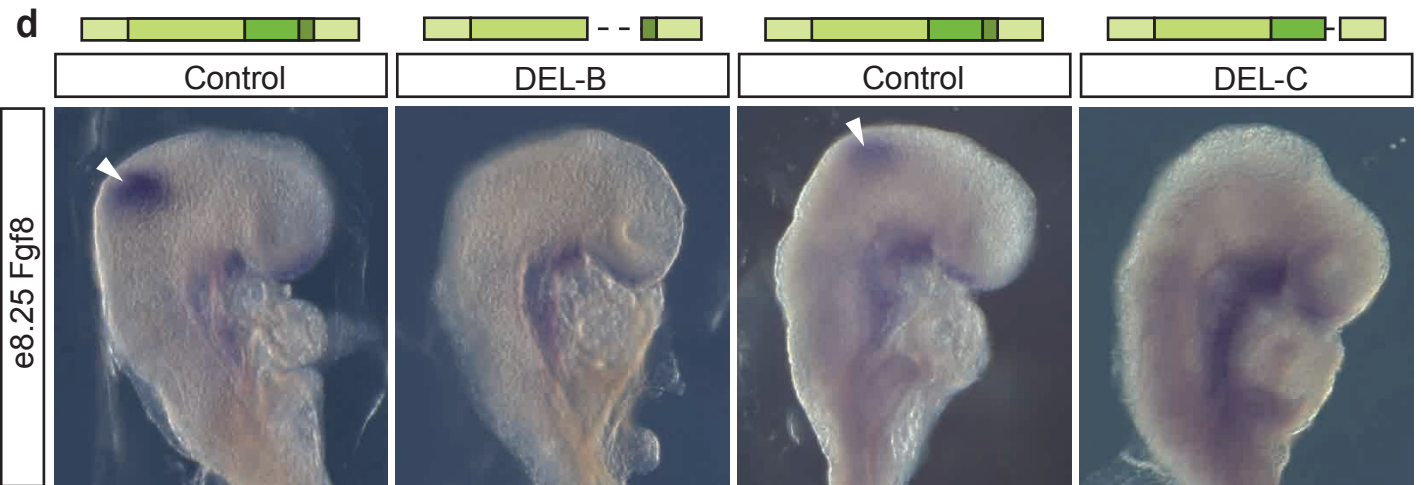

Fig6

bioRxiv preprint doi: <https://doi.org/10.1101/2020.03.03.966796>; this version posted March 3, 2020. The copyright holder for this preprint (which was not certified by peer review) is the author/funder, who has granted bioRxiv a license to display the preprint in perpetuity. It is made available under a [CC-BY-NC-ND 4.0 International license](https://creativecommons.org/licenses/by-nc-nd/4.0/).

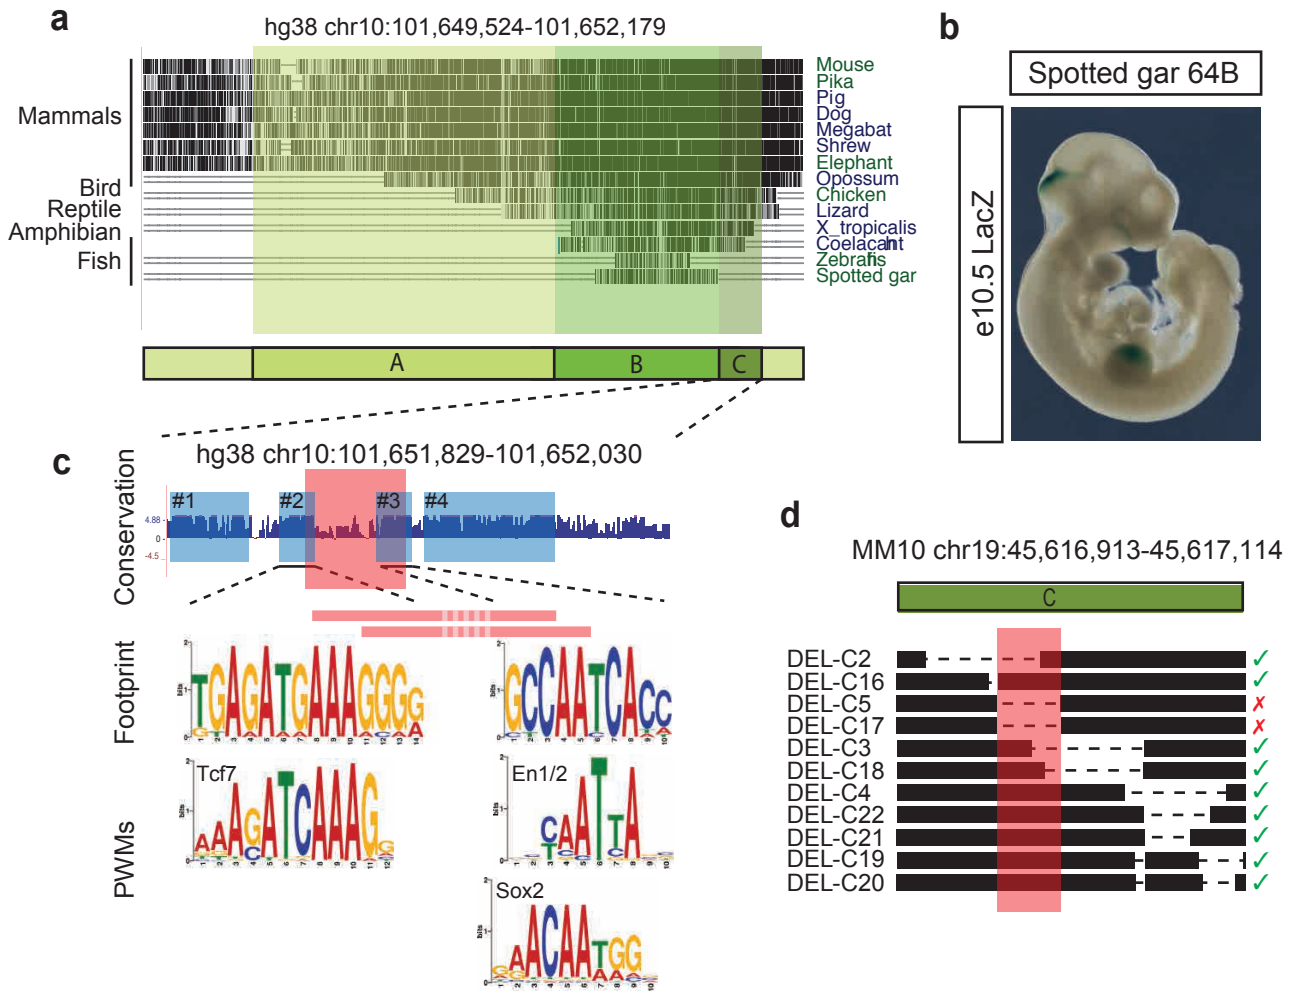

Fig7

bioRxiv preprint doi: <https://doi.org/10.1101/2020.03.03.966796>; this version posted March 3, 2020. The copyright holder for this preprint (which was not certified by peer review) is the author/funder, who has granted bioRxiv a license to display the preprint in perpetuity. It is made available under a [CC-BY-NC-ND 4.0 International license](https://creativecommons.org/licenses/by-nc-nd/4.0/).

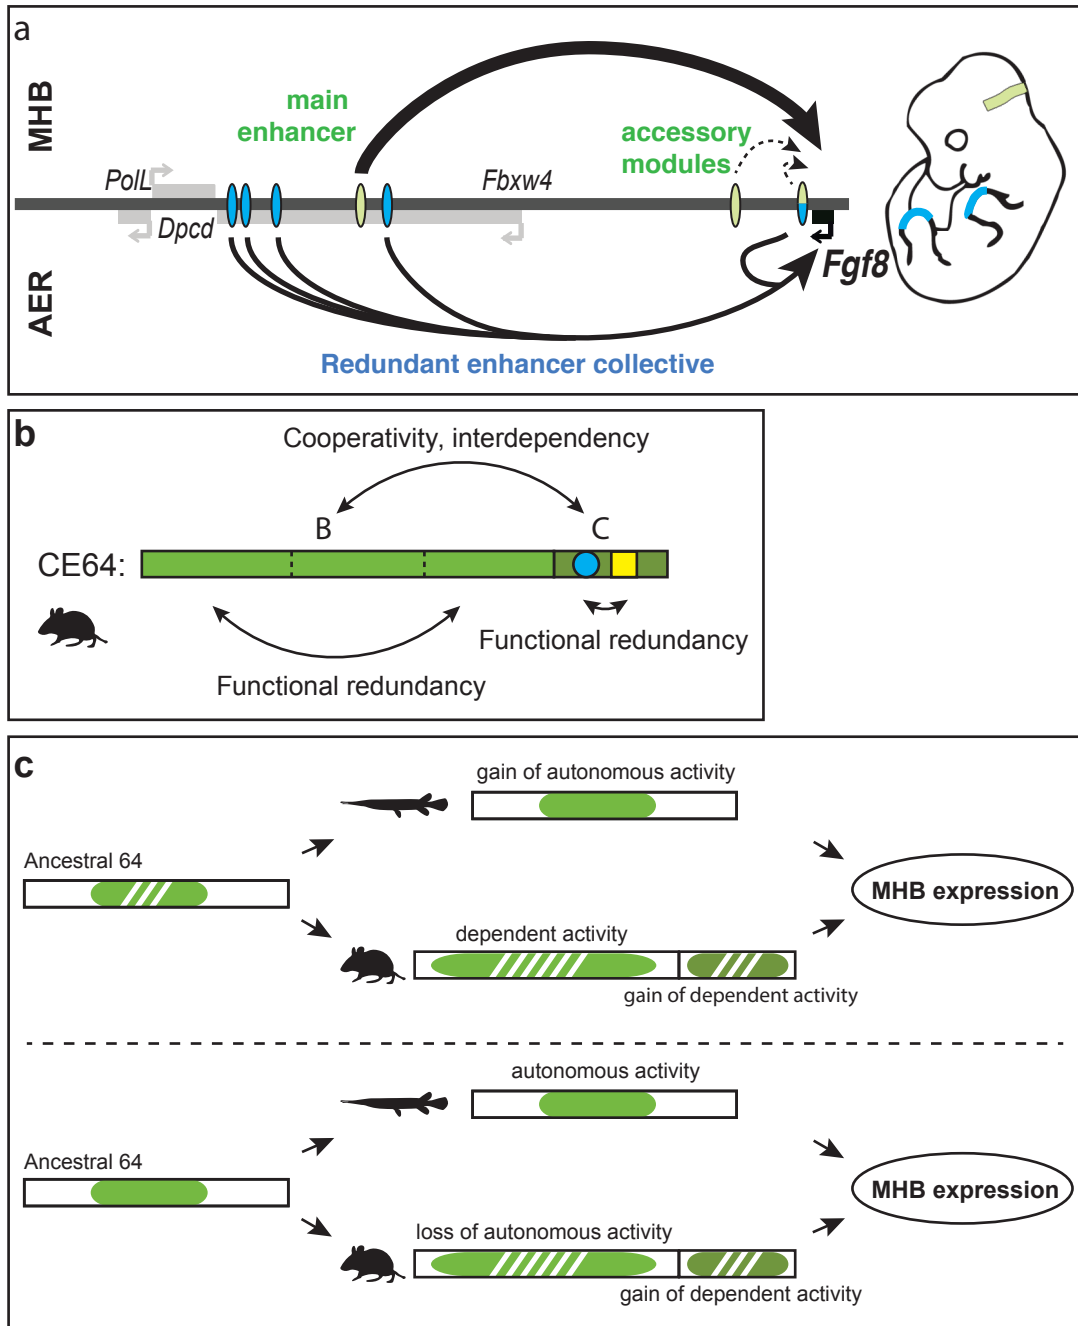

Source: https://www.biorxiv.org/content/biorxiv/early/2020/03/03/2020.03.03.966796.full.pdf
